# Supplementary material for: Comparison of oncologic and functional outcomes between radical nephroureterectomy and segmental ureterectomy for upper urinary tract urothelial carcinoma
Source: Sci Rep. 2021 Apr 9;11:7828. doi: 10.1038/s41598-021-87573-5 (PMC8035162; doi:10.1038/s41598-021-87573-5)

# **Comparison of oncologic and functional outcomes between radical nephroureterectomy and segmental ureterectomy for upper urinary tract urothelial carcinoma**

Tae Heon Kim, MD, PhD<sup>1\*</sup>, Chung Un Lee, M.D.<sup>2\*</sup>, Minyong Kang, MD, PhD<sup>2</sup>, Hwang Gyun Jeon, MD, PhD<sup>2</sup>, Byong Chang Jeong, MD, PhD<sup>2</sup>, Seong Il Seo, MD, PhD<sup>2</sup>, Seong Soo Jeon, MD, PhD<sup>2</sup>, Hyun Moo Lee, MD, PhD<sup>2</sup>, Hyun Hwan Sung, MD, PhD<sup>2</sup>

<sup>1</sup>Department of Urology, CHA Bundang Medical Center, CHA University, Seongnam, Republic of Korea

<sup>2</sup>Department of Urology, Samsung Medical Center, Sungkyunkwan University School of Medicine, Seoul, Republic of Korea

\*Tae Heon Kim and Chung Un Lee contributed equally to this work.

**Running head:** Segmental ureterectomy for UTUC

**Address for correspondence:**

Hyun Hwan Sung, M.D., Ph.D.

Department of Urology, Samsung Medical Center, Sungkyunkwan University School of

Medicine, 81, Irwon-ro, Gangnam-gu, Seoul, 06351, Korea

Tel.: +82-2-3410-0737

Fax: +82-2-3410-3027

E-mail address: [hhsunguro@gmail.com](mailto:hhsunguro@gmail.com)

## Supplementary Materials

Figure S1. In patients with pT2-4, Kaplan–Meier analysis depicting (A) overall survival; (B) cancer-specific survival; (C) progression-free survival; (D) intravesical recurrence-free survival for patients who underwent RNU or SU, after 1:1 propensity score matching. RNU = radical nephroureterectomy; SU = segmental ureterectomy

(A)

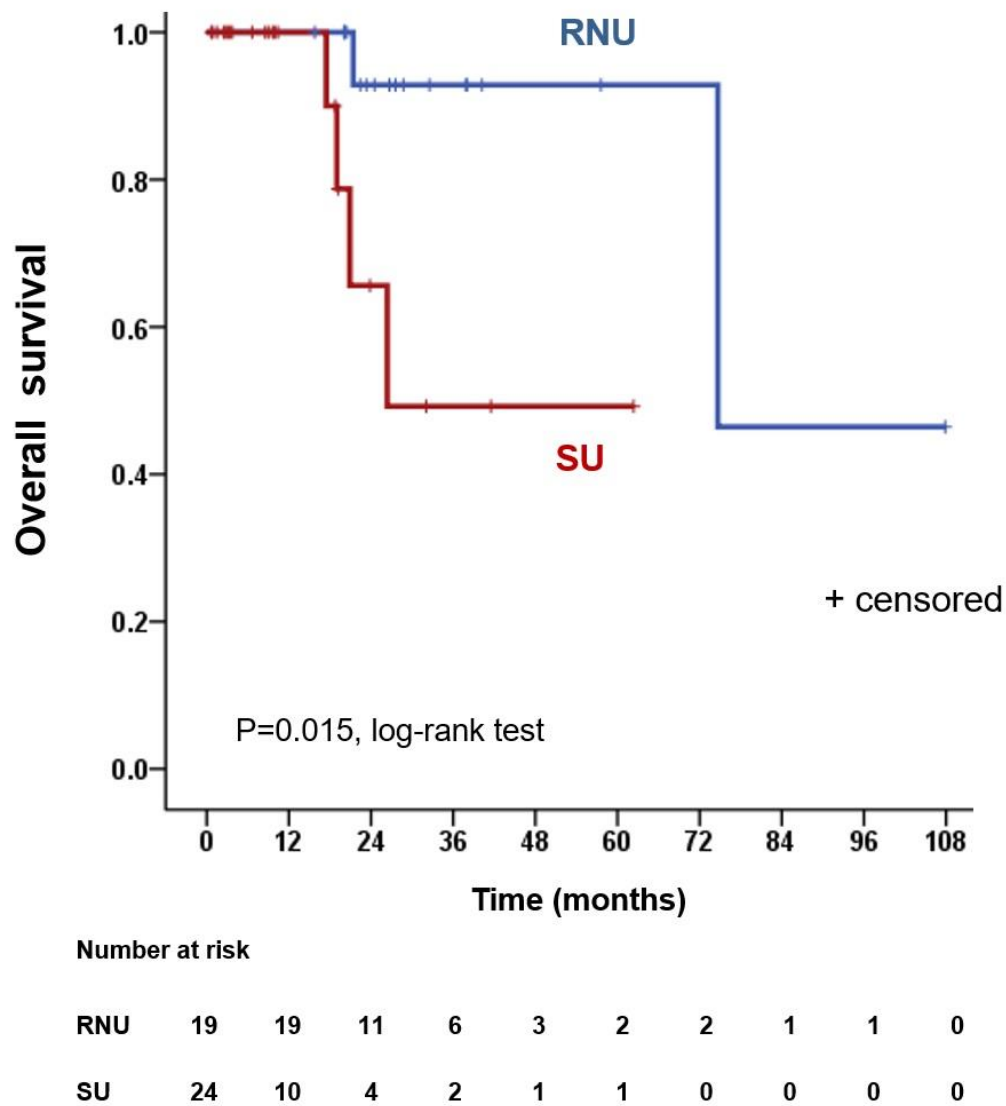

(B)

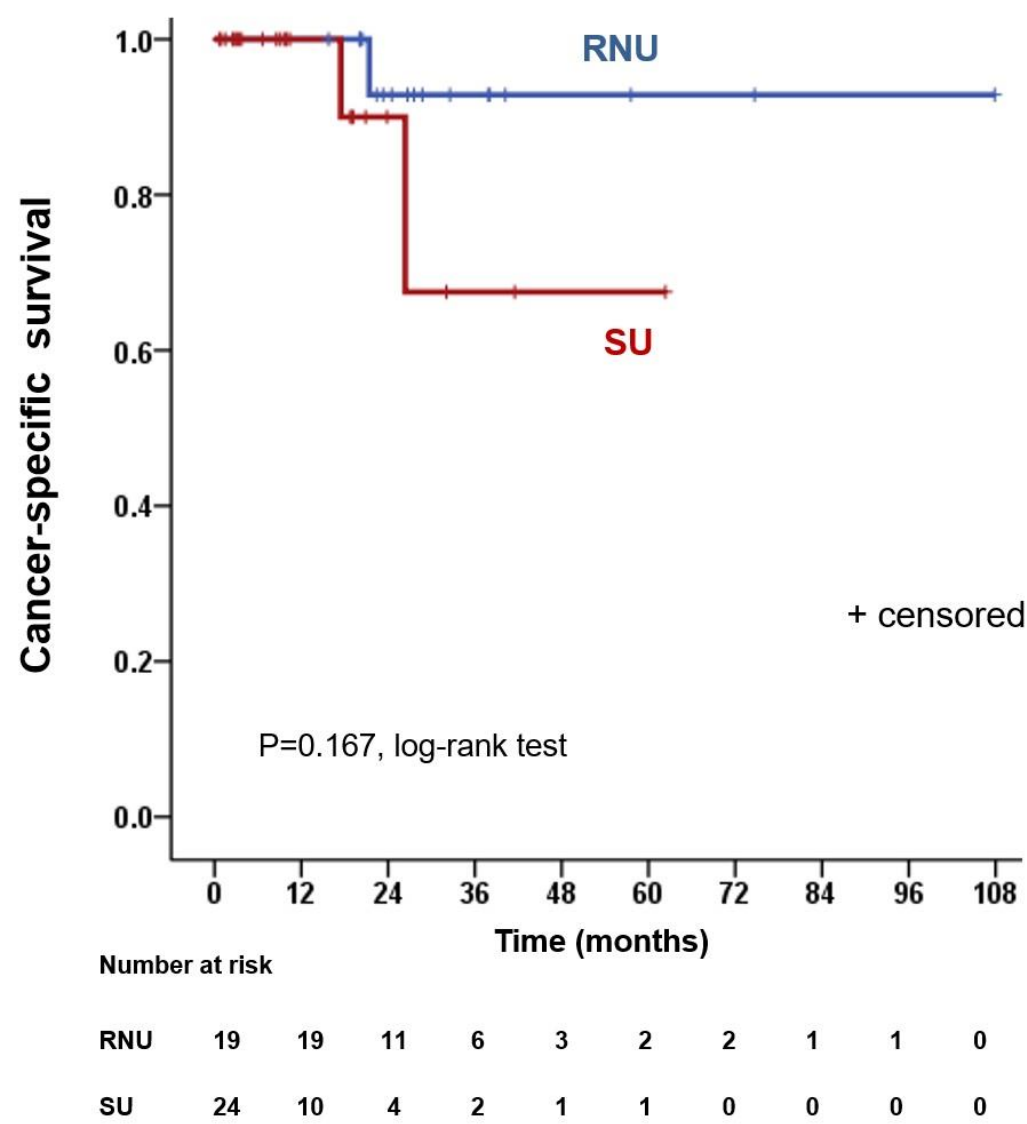

(C)

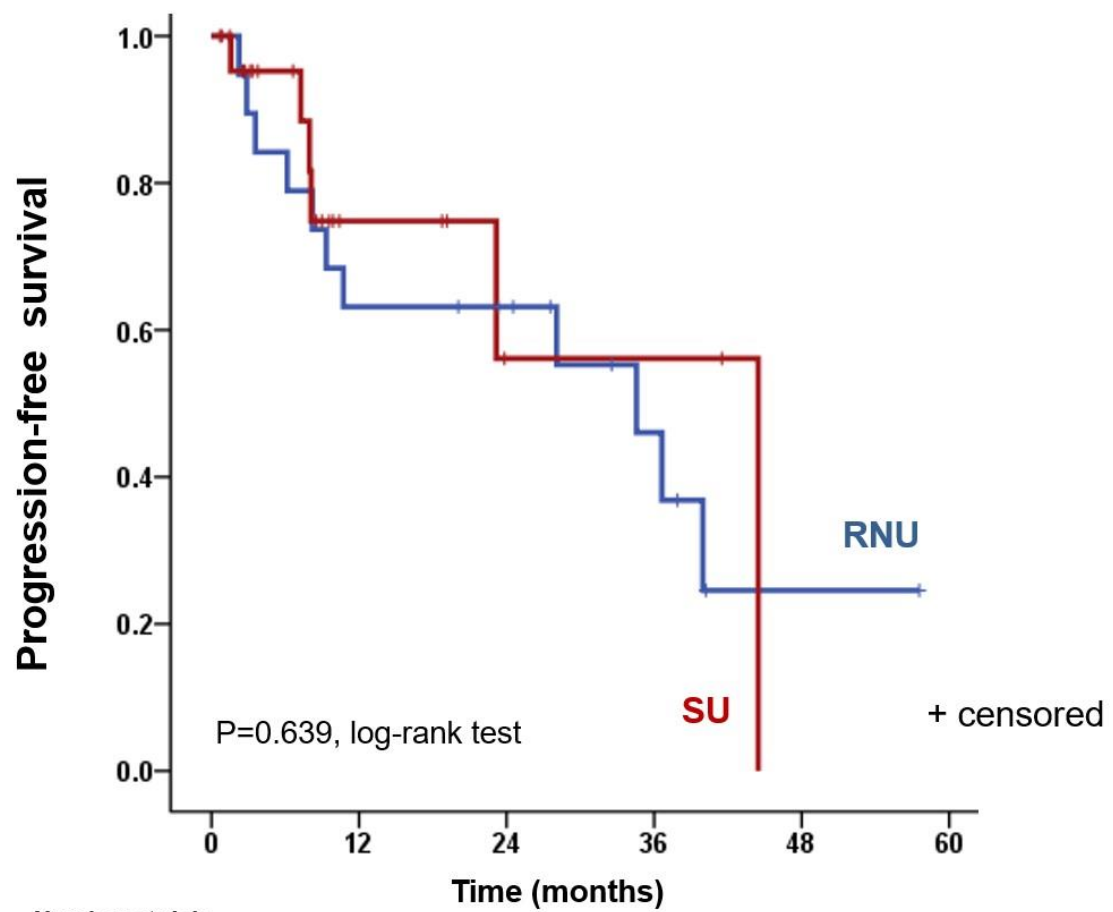

Number at risk

|     |    |    |    |   |   |   |
|-----|----|----|----|---|---|---|
| RNU | 19 | 12 | 10 | 5 | 1 | 0 |
| SU  | 24 | 6  | 2  | 2 | 0 | 0 |

(D)

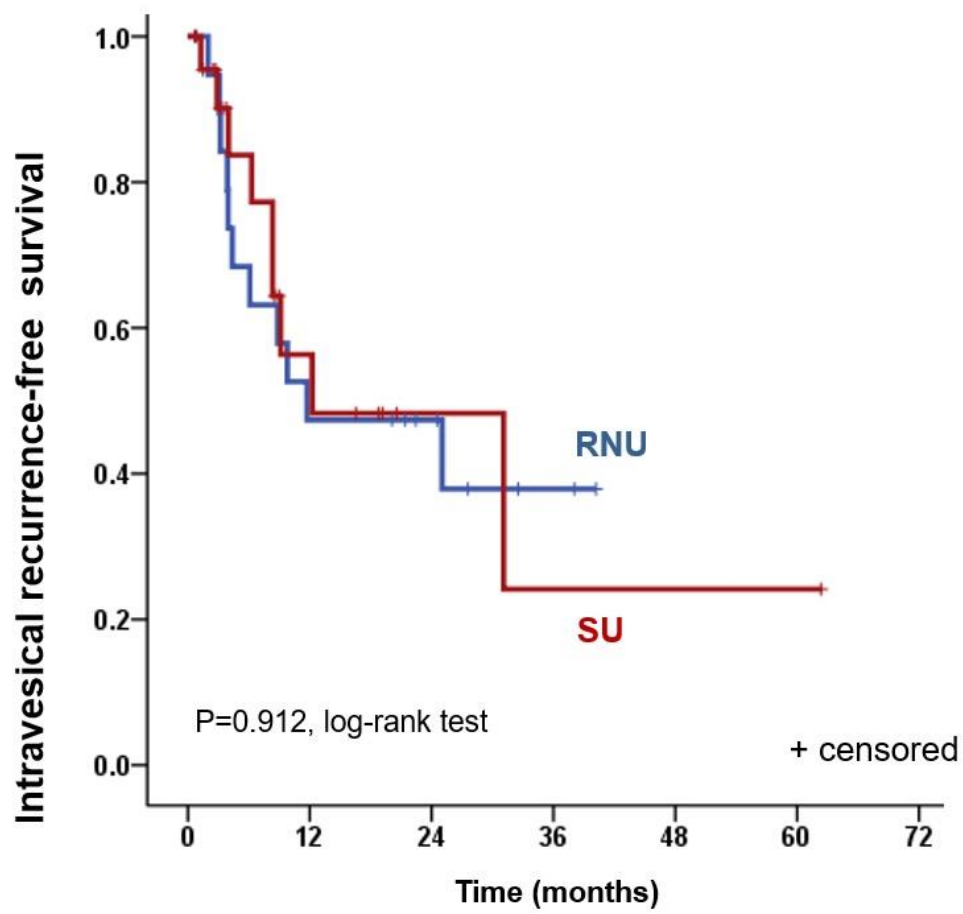

Number at risk

|     |    |   |   |   |   |   |   |
|-----|----|---|---|---|---|---|---|
| RNU | 19 | 9 | 6 | 2 | 0 | 0 | 0 |
| SU  | 24 | 7 | 2 | 1 | 1 | 1 | 0 |

Figure S2. In patients with tumor grade 3, Kaplan–Meier analysis depicting (A) overall survival; (B) cancer-specific survival; (C) progression-free survival; (D) intravesical recurrence-free survival for patients who underwent RNU or SU, after 1:1 propensity score matching. RNU = radical nephroureterectomy; SU = segmental ureterectomy

(A)

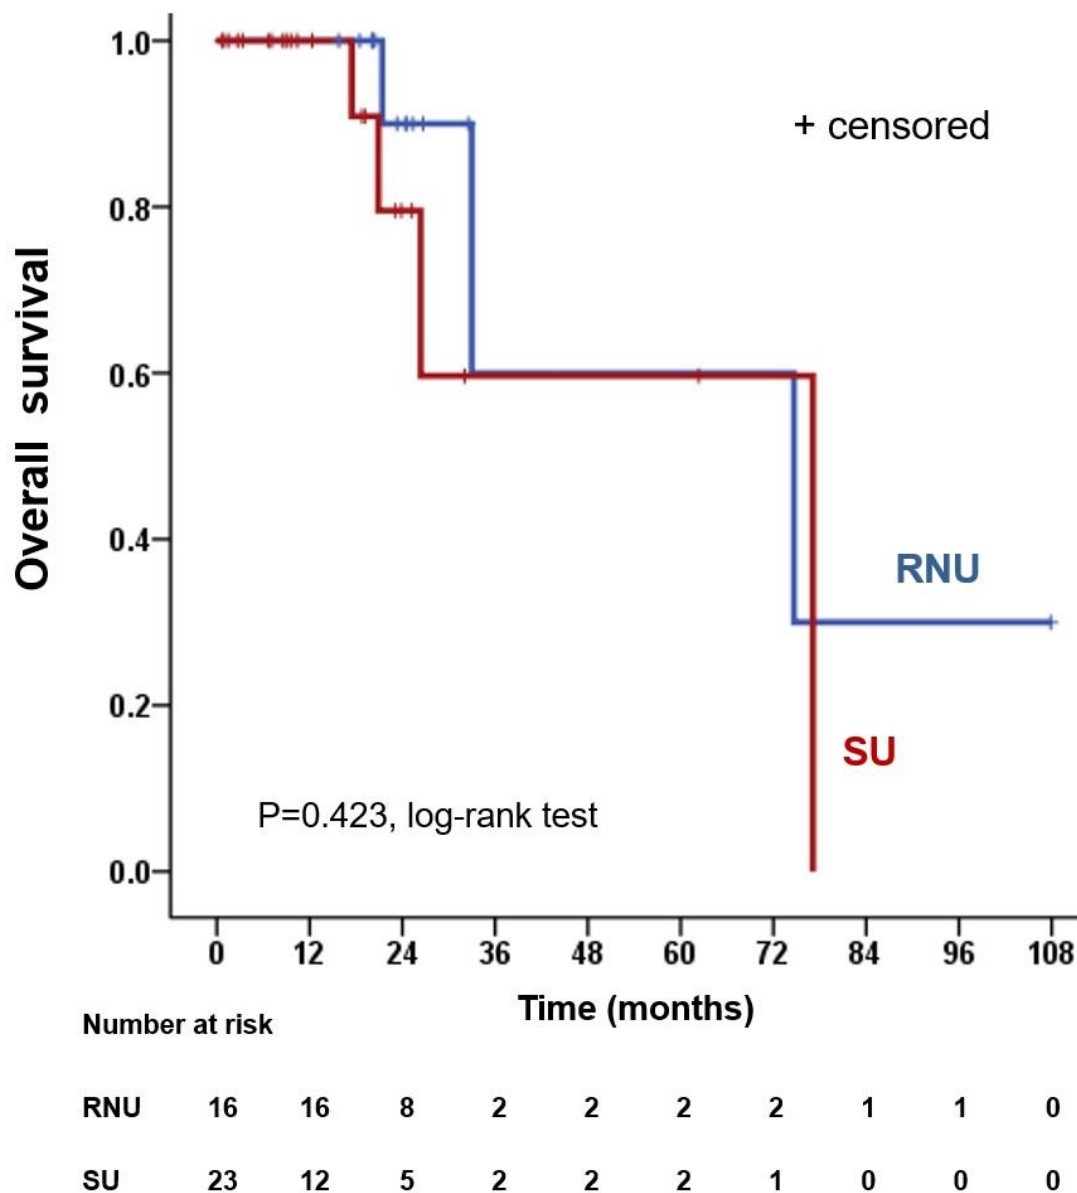

(B)

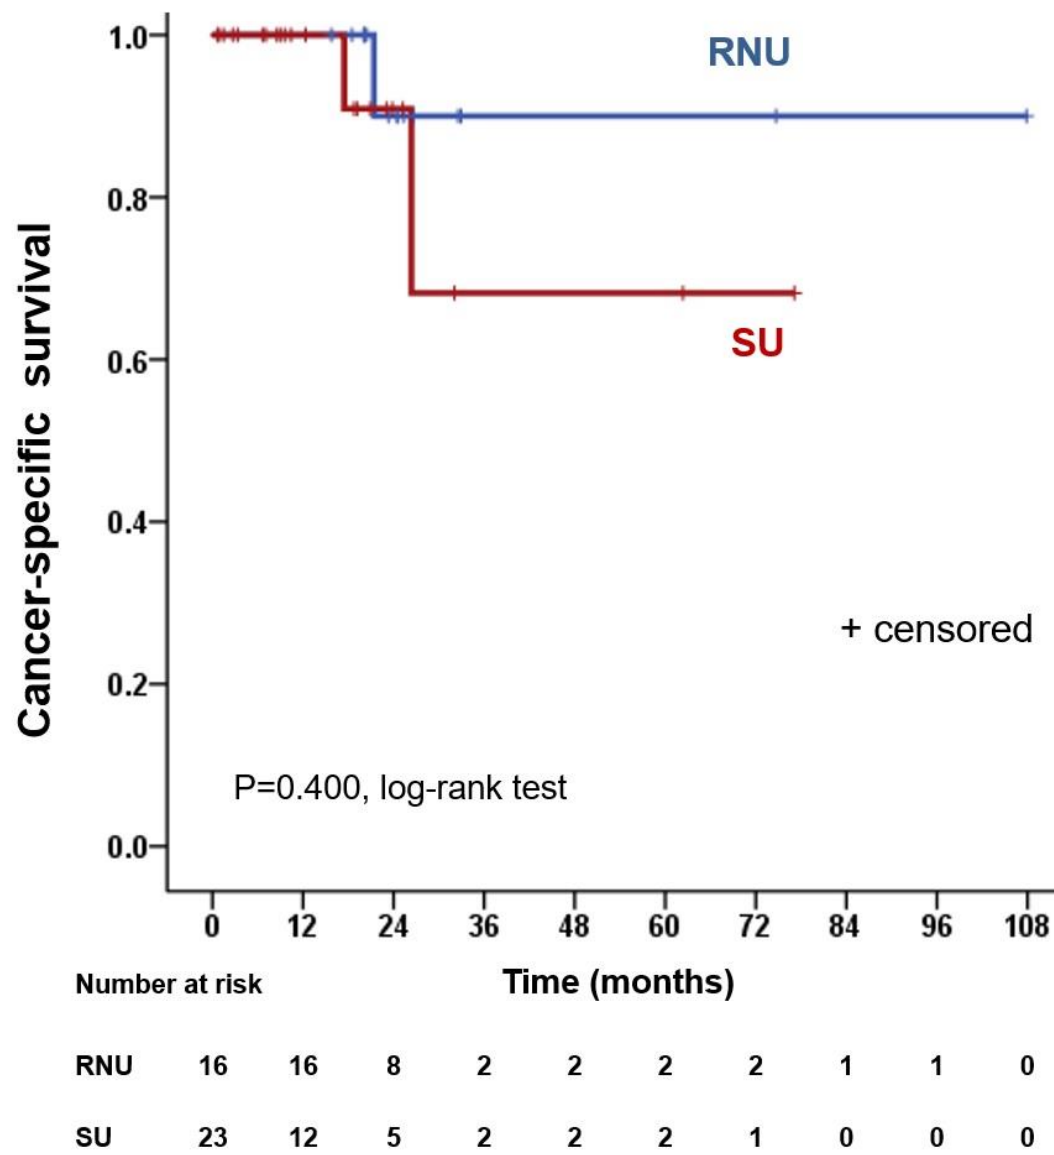

(C)

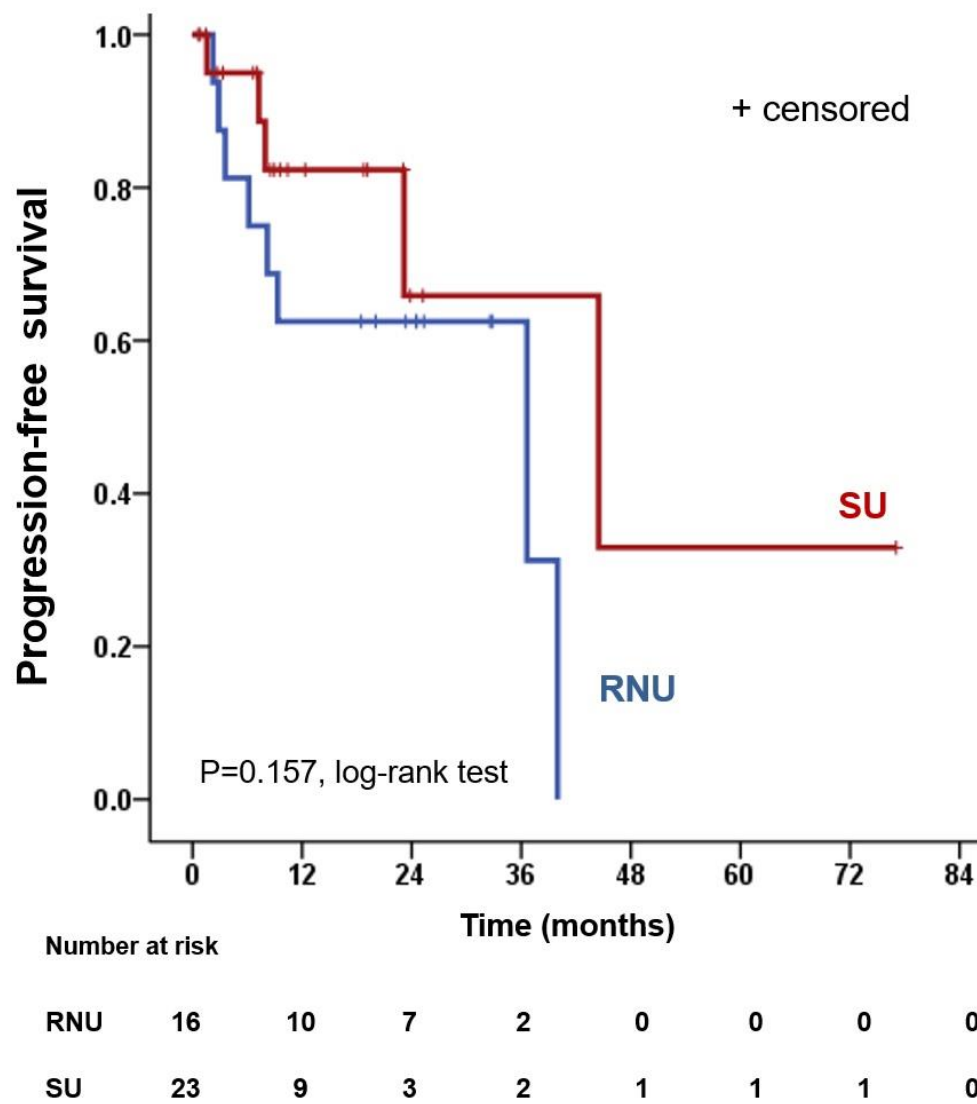

(D)

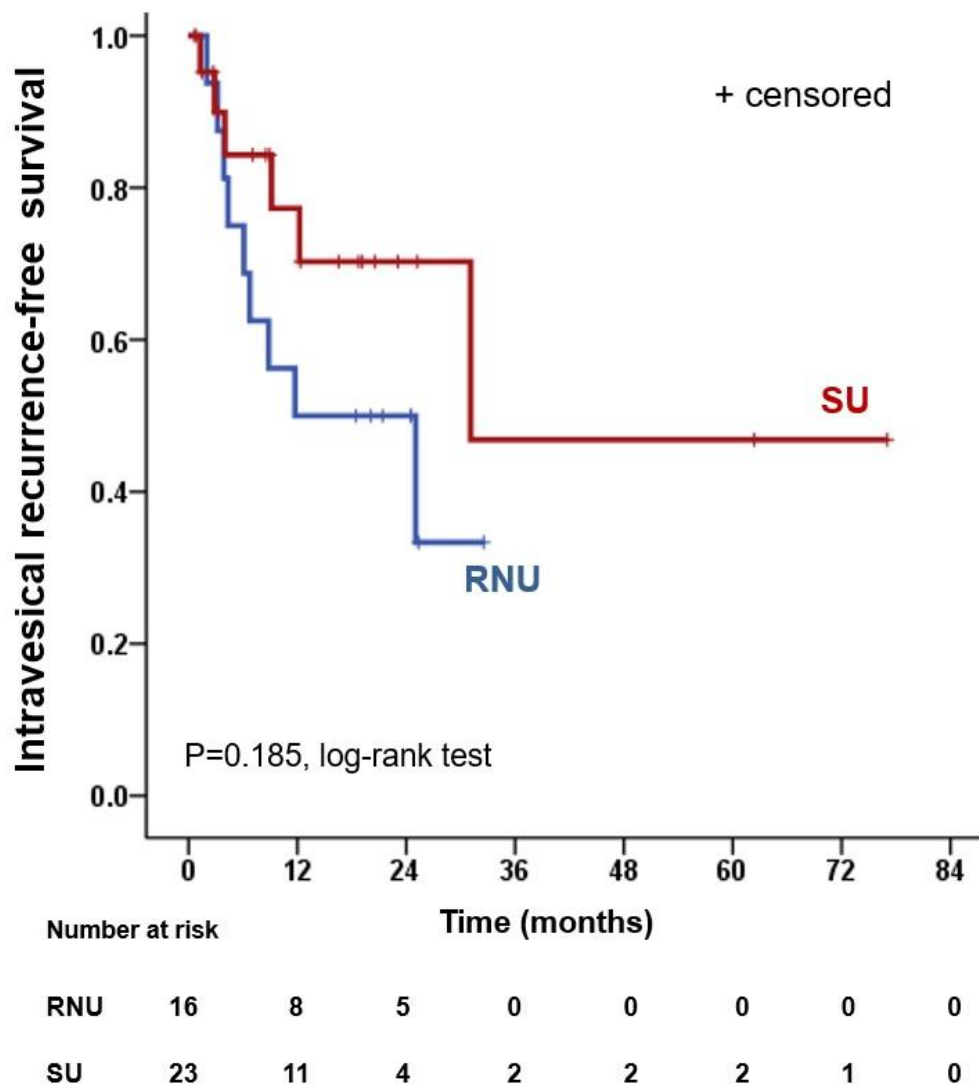

Supplement: Supplementary file 1 — Supplementary Figures. [file 41598_2021_87573_MOESM1_ESM.pdf]
